# Supplementary material for: A label-free electrochemical aptasensor for sensitive edifenphos detection in rice
Source: Royal Society of Chemistry journal article supplement (doi:10.1039/d0ay00011f), 2020-01-01
Supplement: d0ay00011f1.pdf [file d0ay00011f1.pdf]

Supplementary data

## **A label-free electrochemical aptasensor for sensitive edifenphos detection in rice**

**Majid Arvand\*, Javad Gholami**

*Electroanalytical Chemistry Laboratory, Faculty of Chemistry, University of Guilan, Namjoo  
Street, P.O. Box: 1914, Rasht, Iran*

\*Corresponding author. Tel.: +98 13 33233262, fax: +98 13 33233262

*E-mail address:* arvand@guilan.ac.ir (M. Arvand)

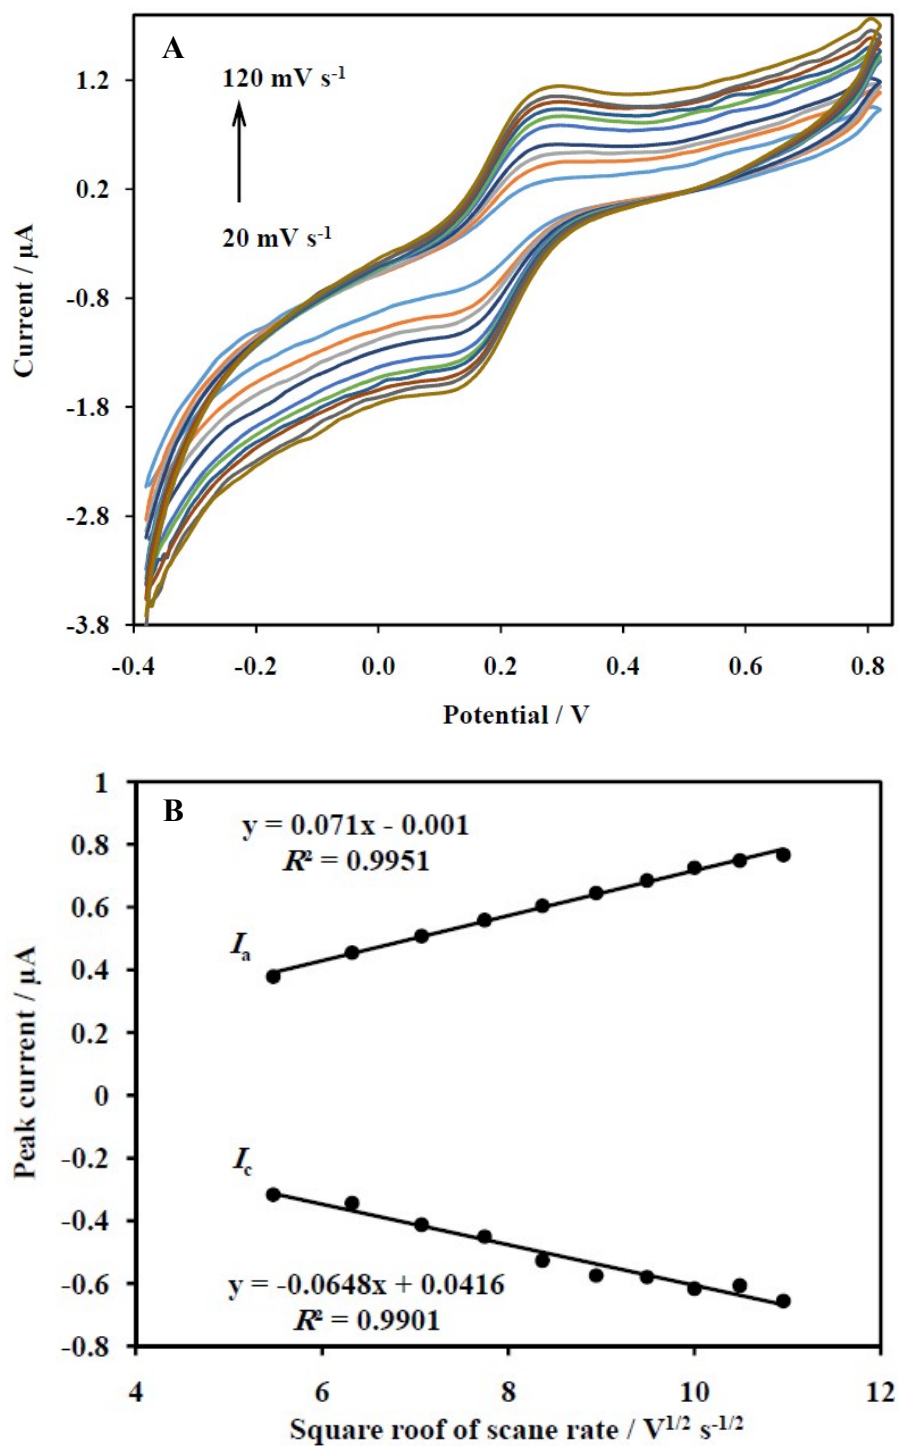

**Fig. S1** (A) CVs of APT/f-MWCNTs-rGO/GCE sensor incubated with EDI ( $0.1 \text{ nmol L}^{-1}$ ) at different scan rates. (B) Relationship between peak currents and square root of potential scan rate.
